# Supplementary material
Source: PubMed Central journal article supplement (PMC3648012)
Supplement: IAI.01244-12_zii999090090so1.pdf [file IAI.01244-12_zii999090090so1.pdf]

**Table S1: Mean values with standard deviations for all assays.**

| Strain name <sup>a</sup> : | Ect1                    |       |                        |        |                  |        | BPH-1                   |       |                        |        |                  |        | Hemolysis <sup>e</sup> |        |
|----------------------------|-------------------------|-------|------------------------|--------|------------------|--------|-------------------------|-------|------------------------|--------|------------------|--------|------------------------|--------|
|                            | Attachment <sup>b</sup> |       | Cytolysis <sup>c</sup> |        | ADC <sup>d</sup> |        | Attachment <sup>b</sup> |       | Cytolysis <sup>c</sup> |        | ADC <sup>b</sup> |        |                        |        |
|                            | mean                    | stdev | mean                   | stdev  | mean             | stdev  | mean                    | stdev | mean                   | stdev  | mean             | stdev  | mean                   | stdev  |
| Bkgd                       |                         |       | 6.731                  | 3.106  | 5.033            | 1.452  |                         |       | 0.868                  | 0.675  | 5.992            | 2.368  | 1.700                  | 1.161  |
| T1                         | 4.071                   | 0.885 | 1.518                  | 1.210  | 1.764            | 0.629  | 1.198                   | 0.512 | 2.239                  | 0.931  | 7.573            | 3.397  | 1.400                  | 0.144  |
| G3                         | 5.045                   | 1.328 | 6.226                  | 1.813  | 3.448            | 0.565  | 3.665                   | 2.456 | 8.700                  | 1.908  | 3.349            | 1.353  | 37.884                 | 14.446 |
| NYH286                     | 5.616                   | 1.411 | 1.522                  | 1.275  | 0.584            | 0.460  | 2.198                   | 0.873 | 1.461                  | 1.103  | 4.479            | 2.204  | 9.943                  | 2.572  |
| NYH272                     | 6.864                   | 1.478 | 12.063                 | 2.585  | 3.021            | 1.183  | 6.447                   | 3.304 | 7.230                  | 1.347  | 2.961            | 0.380  | 22.345                 | 4.364  |
| CDC337                     | 6.866                   | 0.919 | 3.760                  | 1.438  | 3.070            | 1.385  | 2.021                   | 0.369 | 2.983                  | 1.172  | 4.196            | 0.605  | 8.913                  | 1.449  |
| CDC570                     | 8.095                   | 5.467 | 4.662                  | 1.336  | 2.753            | 0.640  | 4.106                   | 0.765 | 3.194                  | 1.324  | 4.503            | 0.486  | 5.793                  | 1.092  |
| RU384                      | 8.221                   | 1.262 | 7.798                  | 2.231  | 1.643            | 1.128  | 3.189                   | 1.779 | 5.946                  | 2.255  | 5.459            | 1.172  | 27.274                 | 6.780  |
| MSA1043                    | 8.809                   | 1.177 | 44.540                 | 6.823  | 0.755            | 0.559  | 11.929                  | 2.380 | 31.578                 | 4.581  | 4.790            | 1.312  | 0.356                  | 0.183  |
| MSA881                     | 9.856                   | 3.161 | 6.329                  | 2.283  | 1.619            | 0.183  | 4.240                   | 0.848 | 1.538                  | 0.694  | 5.745            | 0.624  | 2.855                  | 0.624  |
| NYH209                     | 11.383                  | 1.968 | 11.863                 | 1.459  | 3.734            | 0.117  | 6.005                   | 3.063 | 3.154                  | 0.980  | 3.222            | 0.834  | 19.532                 | 1.540  |
| MSA1124                    | 11.673                  | 2.808 | 50.515                 | 5.867  | 2.048            | 0.767  | 13.949                  | 0.725 | 58.761                 | 5.823  | 3.500            | 0.830  | 2.119                  | 0.016  |
| MSA1103                    | 12.244                  | 1.581 | 57.112                 | 7.549  | 3.273            | 0.520  | 39.563                  | 4.947 | 71.672                 | 4.396  | 4.416            | 0.384  | 6.477                  | 1.290  |
| SD10                       | 12.513                  | 2.484 | 31.623                 | 2.721  | 0.835            | 0.392  | 6.062                   | 2.472 | 8.879                  | 2.766  | 4.349            | 0.835  | 7.140                  | 1.899  |
| MSA1123                    | 16.662                  | 2.922 | 4.182                  | 1.540  | 1.747            | 1.032  | 11.440                  | 2.788 | 4.539                  | 1.409  | 4.123            | 0.926  | 1.297                  | 1.053  |
| HsD:NIH                    | 18.916                  | 2.525 | 13.935                 | 3.113  | 3.131            | 0.905  | 14.870                  | 2.267 | 10.777                 | 2.858  | 5.992            | 2.368  | 3.600                  | 2.409  |
| RU382                      | 20.980                  | 2.225 | 12.341                 | 4.070  | 1.621            | 0.866  | 12.647                  | 3.550 | 20.839                 | 2.983  | 8.551            | 1.948  | 5.813                  | 2.540  |
| RU393                      | 21.562                  | 1.753 | 40.415                 | 7.306  | 0.596            | 0.858  | 13.101                  | 2.232 | 64.088                 | 7.766  | 5.278            | 1.893  | 4.272                  | 1.546  |
| LSU2048                    | 24.169                  | 2.986 | 78.512                 | 8.687  | 1.921            | 0.595  | 22.217                  | 3.752 | 66.139                 | 7.465  | 4.198            | 0.382  | 10.372                 | 2.683  |
| CDC1042                    | 25.279                  | 4.133 | 62.313                 | 7.223  | 3.127            | 1.574  | 31.263                  | 6.760 | 74.885                 | 6.629  | 5.555            | 0.872  | 10.924                 | 2.387  |
| SD7                        | 25.376                  | 2.250 | 45.878                 | 3.003  | 2.612            | 2.642  | 54.075                  | 8.210 | 57.224                 | 6.082  | 1.061            | 0.880  | 0.890                  | 0.639  |
| LSU160                     | 26.807                  | 4.254 | 73.654                 | 5.338  | 2.437            | 0.733  | 46.931                  | 4.902 | 80.719                 | 5.980  | 3.778            | 0.231  | 15.189                 | 5.640  |
| MSA1106                    | 28.032                  | 3.200 | 17.628                 | 2.668  | 1.998            | 0.235  | 31.723                  | 6.126 | 38.874                 | 16.508 | 4.676            | 0.571  | 15.823                 | 9.523  |
| B7268                      | 33.138                  | 4.014 | 35.250                 | 3.974  | 3.543            | 1.072  | 42.246                  | 7.223 | 8.784                  | 2.668  | 1.911            | 1.612  | 6.267                  | 1.955  |
| LA1                        | 34.142                  | 9.900 | 46.095                 | 12.625 | 4.665            | 1.310  | 11.280                  | 2.446 | 68.331                 | 9.654  | 3.944            | 0.971  | 18.434                 | 3.672  |
| B7RC2                      | 36.422                  | 4.390 | 6.015                  | 3.433  | 5.120            | 0.626  | 32.091                  | 3.788 | 6.082                  | 1.922  | 2.892            | 1.185  | 2.642                  | 0.491  |
| MSA1132                    | 50.375                  | 5.993 | 76.236                 | 7.859  | 2.574            | 0.448  | 43.496                  | 1.402 | 94.433                 | 8.430  | 3.023            | 0.650  | 15.705                 | 5.141  |
| +C                         |                         |       | 92.580                 | 6.120  | 95.148           | 6.821  |                         |       | 91.561                 | 6.060  | 97.256           | 3.964  | 95.833                 | 0.715  |
| MSA1132(*)                 |                         |       |                        |        | 76.694           | 11.518 |                         |       |                        |        | 50.147           | 13.140 |                        |        |

<sup>a</sup> Strains ordered by increased attachment to Ect1 cells

<sup>b</sup> percent of attached parasites

<sup>c</sup> percent of LDH release

<sup>d</sup> ADC: attachment-dependent cytolysis

**Table S2: Pearson correlation ranks.** Strains ranked independently for attachment, cytolysis and hemolysis.

| Strain              | Ect1       |           | BPH-1      |           |           |
|---------------------|------------|-----------|------------|-----------|-----------|
| name <sup>a</sup> : | Attachment | Cytolysis | Attachment | Cytolysis | Hemolysis |
| T1                  | 1          | 1         | 1          | 3         | 4         |
| NYH286              | 2          | 2         | 3          | 1         | 16        |
| G3                  | 3          | 7         | 5          | 11        | 26        |
| NYH272              | 4          | 11        | 10         | 10        | 24        |
| CDC337              | 5          | 3         | 2          | 4         | 15        |
| CDC570              | 6          | 5         | 6          | 6         | 10        |
| RU384               | 7          | 9         | 4          | 8         | 25        |
| MSA1043             | 8          | 18        | 13         | 16        | 1         |
| MSA881              | 9          | 8         | 7          | 2         | 7         |
| NYH209              | 10         | 10        | 8          | 5         | 23        |
| MSA1124             | 11         | 21        | 16         | 19        | 5         |
| MSA1103             | 12         | 22        | 22         | 23        | 13        |
| SD10                | 13         | 4         | 9          | 7         | 3         |
| MSA1123             | 14         | 15        | 12         | 13        | 14        |
| HsD:NIH             | 15         | 12        | 17         | 14        | 8         |
| RU382               | 16         | 12        | 14         | 15        | 11        |
| RU393               | 17         | 17        | 15         | 20        | 9         |
| LSU2048             | 18         | 26        | 18         | 21        | 17        |
| CDC1042             | 19         | 23        | 19         | 24        | 18        |
| SD7                 | 20         | 20        | 26         | 22        | 22        |
| LSU160              | 21         | 14        | 25         | 17        | 21        |
| MSA1106             | 22         | 24        | 20         | 25        | 19        |
| B7268               | 23         | 19        | 23         | 18        | 2         |
| LA1                 | 24         | 16        | 11         | 12        | 12        |
| B7RC2               | 25         | 6         | 21         | 9         | 6         |
| MSA1132             | 26         | 25        | 24         | 26        | 20        |

<sup>a</sup> Strains ordered by increased attachment to Ect1 cells
